# Supplementary material for: Computational identification, characterization and validation of potential antigenic peptide vaccines from hrHPVs E6 proteins using immunoinformatics and computational systems biology approaches
Source: PubMed Central journal article supplement (PMC5929558; doi:10.1371/journal.pone.0196484), 2018-05-01

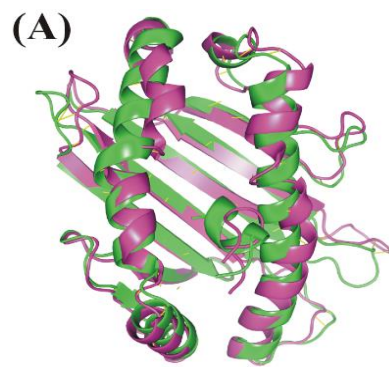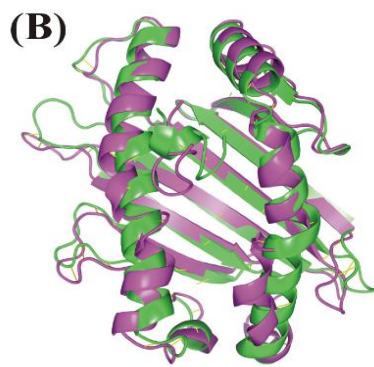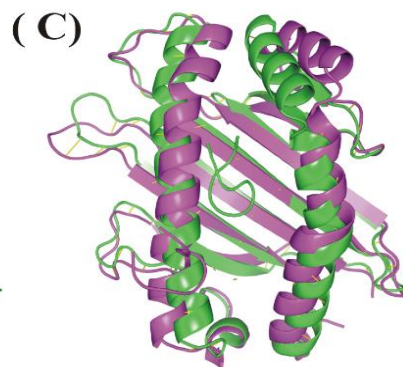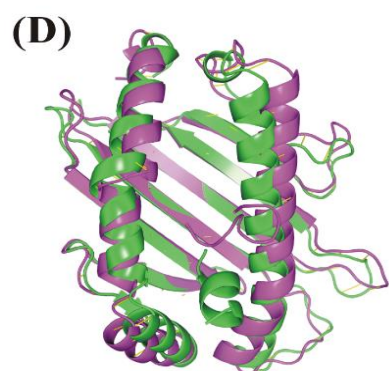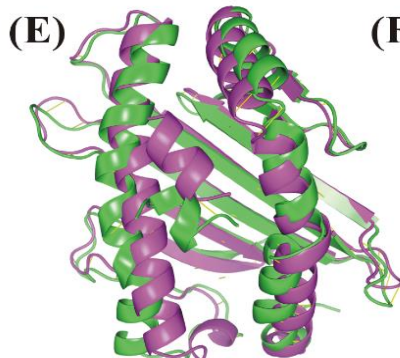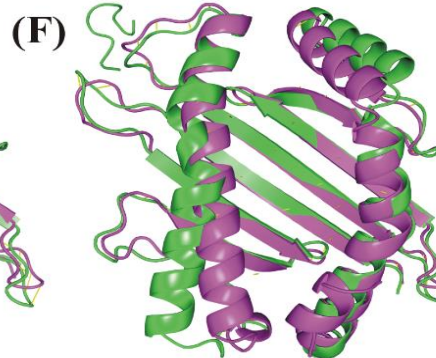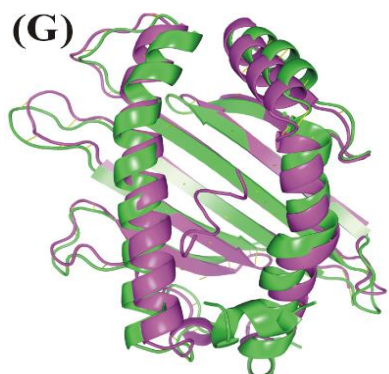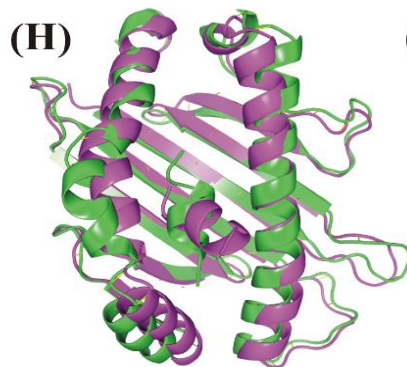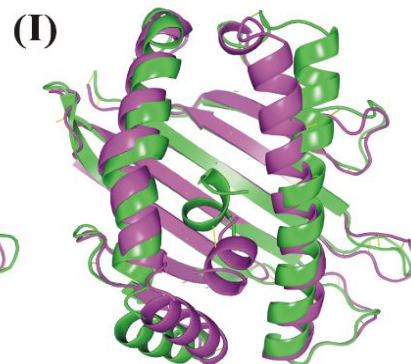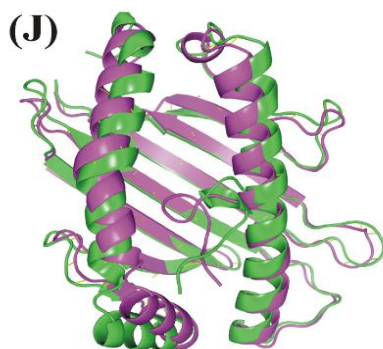

Supplement: pone.0196484.s009.pdf [file pone.0196484.s009.pdf]
